## Serial evaluation of cardiac allograft vasculopathy after heart transplantation by dual-modality intravascular ultrasound and optical coherence tomography

T. Shiraki<sup>1</sup>, T. Ohtani<sup>1</sup>, H. Kioka<sup>1</sup>, I. Mizote<sup>1</sup>, Y. Tsukamoto<sup>1</sup>, D. Nakamura<sup>1</sup>, K. Yokoi<sup>1</sup>, S. Ide<sup>1</sup>, K. Nakamoto<sup>1</sup>, Y. Takeda<sup>1</sup>, S. Hikoso<sup>1</sup>, Y. Sawa<sup>2</sup>, Y. Sakata<sup>1</sup>

<sup>1</sup>Osaka University Graduate School of Medicine, Cardiovascular Medicine, Suita, Japan; <sup>2</sup>Osaka University Graduate School of Medicine, Cardiovascular Surgery, Suita, Japan

**Funding Acknowledgement:** Type of funding source: Public grant(s) – National budget only. Main funding source(s): Grants-in-Aid for Scientific Research (KAKENHI)

**Background:** Cardiac allograft vasculopathy is a combination of the development of de novo plaque and the progression of donor-transmitted plaque.

**Purpose:** This study aimed to evaluate the development of de novo plaque and the progression of donor-transmitted plaque within 12-month after heart transplantation (HTx) using serial intravascular ultrasound (IVUS) and optical coherence tomography (OCT). The association between inflammatory cytokines and plaque progression was also examined.

**Methods:** We prospectively enrolled 40 recipients to conduct serial three-vessel IVUS and OCT analysis at 8-week and 12-month after HTx. De novo plaque was defined as having maximum intimal thickness (MIT)  $\geq 0.5$  mm at 12-month in the absence of donor-transmitted plaques (MIT  $\geq 0.5$  mm at 8-week). Serum cytokines were screened with a bead-based multiplex assay.

**Results:** A total of 13 de novo plaques (fibrous, n=10; fibroatheroma, n=3) were detected in eight recipients. Serum interleukin (IL)-31 at 8-week was associated with the development of de novo plaques (p=0.009). A total

of 31 donor-transmitted plaques (fibrous, n=12; fibroatheroma, n=11; fibrocalcific, n=8) were detected in 17 recipients. Multiple regression analysis revealed that fibrous (p=0.026) and fibroatheroma (p=0.012) observed at 8-week were significantly associated with subsequent plaque progression within 12-month after HTx.  $\Delta$ Plaque burden was significantly higher in de novo plaque than donor-transmitted plaque (38.8% [29.6–41.2] versus 8.7% [1.3–13.6], p<0.001). The prevalence of macrophage accumulation was lower in de novo plaque than in donor-transmitted plaque (8% versus 52%, p=0.006). Serum IL-31 at 8-week was correlated with the progression of donor-transmitted plaque as well as de novo plaque (r=0.663, p=0.029) although other cytokines like IL-1 $\beta$ , IL-6, IL-17, and tissue necrotic factor alpha were not.

**Conclusions:** In de novo plaques, fibrous plaque was the most common and macrophage accumulation was rarely observed. In donor-transmitted plaque, fibrous and fibroatheroma were independent predictor for the subsequent plaque progression. Serum interleukin-31 surge at subacute phase may play pathogenic role in cardiac allograft vasculopathy.
